# Supplementary material for: SUMOylation of Bonus, the Drosophila homolog of Transcription Intermediary Factor 1, safeguards germline identity by recruiting repressive chromatin complexes to silence tissue-specific genes
Source: eLife. 2023 Nov 24;12:RP89493. doi: 10.7554/eLife.89493 (PMC10672805; doi:10.7554/eLife.89493)
Supplement: Supplementary file 1. [file elife-89493-supp1.docx]

**Supplementary File 1.**

**Supplementary Table 1. Primers used for RT-qPCR and shRNAs.**

| Purpose | Name | Sequence (5’ to 3’) |
| --- | --- | --- |
| TRiP Short Hairpin | shBonus | CACACTCGTTTCCGAAATCAA |
| Oligos for RT-qPCR and ChIP-qPCR | bon-for | ACTTCTGGGTCTGACTGGCGAAG |
| bon-rev | TCAACGCACCACGACGTGG |
| rp49-for | CCGCTTCAAGGGACAGTATCTG |
| rp49-rev | ATCTCGCCGCAGTAAACGC |
| ple-for | AGCAGACCAAACAAACCGTCCTC |
| ple-rev | CACATCTTGCTCGGAGGGAAT |
| rbp6-for | CGCACCTCCCTATCTATCTATCT |
| rbp6-rev | GTGTTCTTTTTTGCATTTTCTGTGCTT |
| CG34353-for | TACCGTTTTTTGGCACCTACGC |
| CG34353-rev | GATGGTGCTAGAATCTTGCCC |
| pst-for | GCAGCAAGCTATTCGATCGCAG |
| pst-rev | CTGCCAATCCCACAGTGCCAC |
| mKate_reporter-for | TCAGAGGGGTGAACTTCCCA |
| mKate_reporter-rev | CTCCCAGCCGAGTGTTTTCT |
| luc_reporter-for | TGATTATGTCCGGCTACGTGAAT |
| luc_reporter-rev | GGTCCACGATGAAGAAGTGCTC |
| CG3191-for | CGAAGGAGAGGTGCAGATATTC |
| CG3191-rev | GCTGGAGGAACTTGATGTAGG |
| Spn88Eb-for | CGAGCGTGAGCAGGAAAT |
| Spn88Eb-rev | GACTTGTATATGGTGCGGTAGG |
