# Supplementary figures and images for: SUMOylation of Bonus, the Drosophila homolog of Transcription Intermediary Factor 1, safeguards germline identity by recruiting repressive chromatin complexes to silence tissue-specific genes
Source: eLife journal article supplement (doi:10.7554/elife.89493), 2023-09-05

Figure 4B

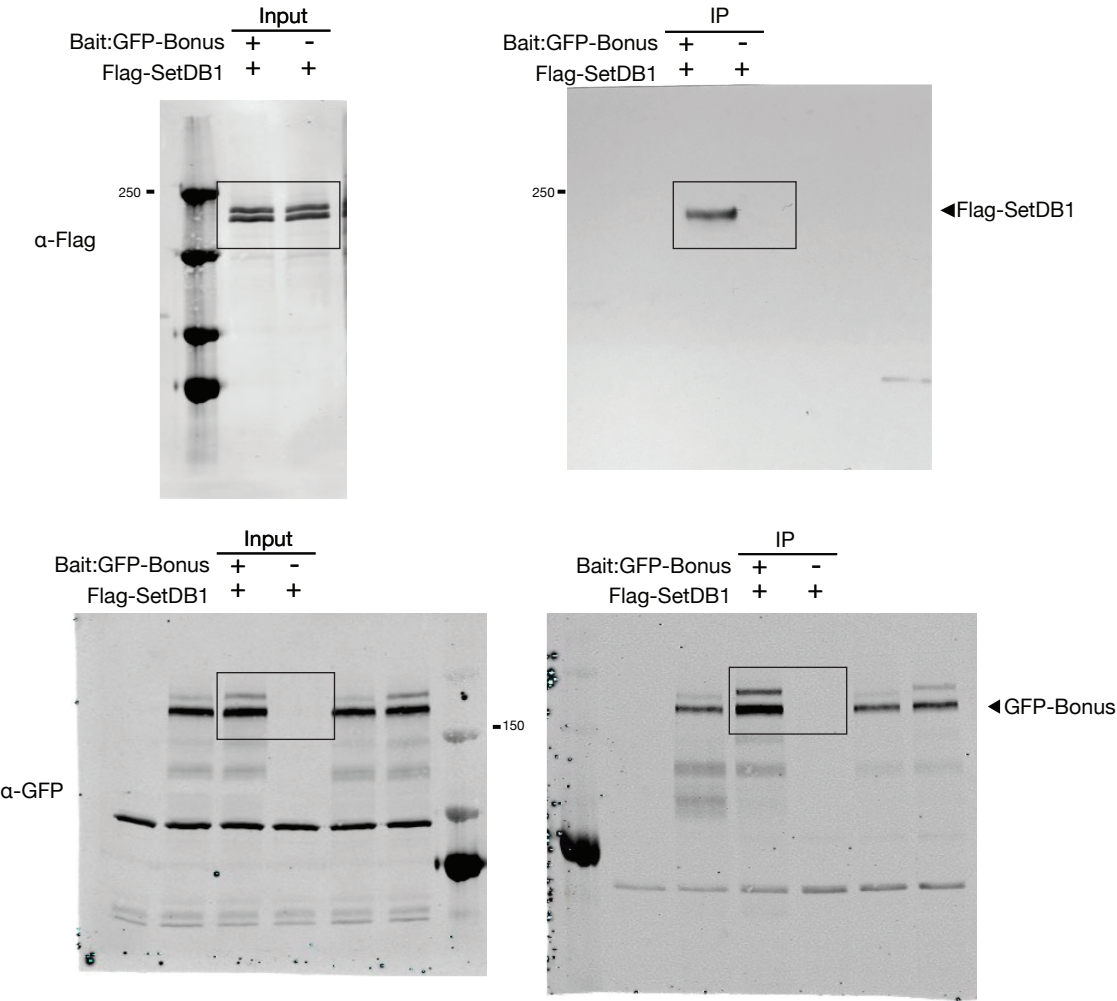

Supplement: fig4-data1 [file elife-89493-fig4-data1-v1.zip]

Figure 4C

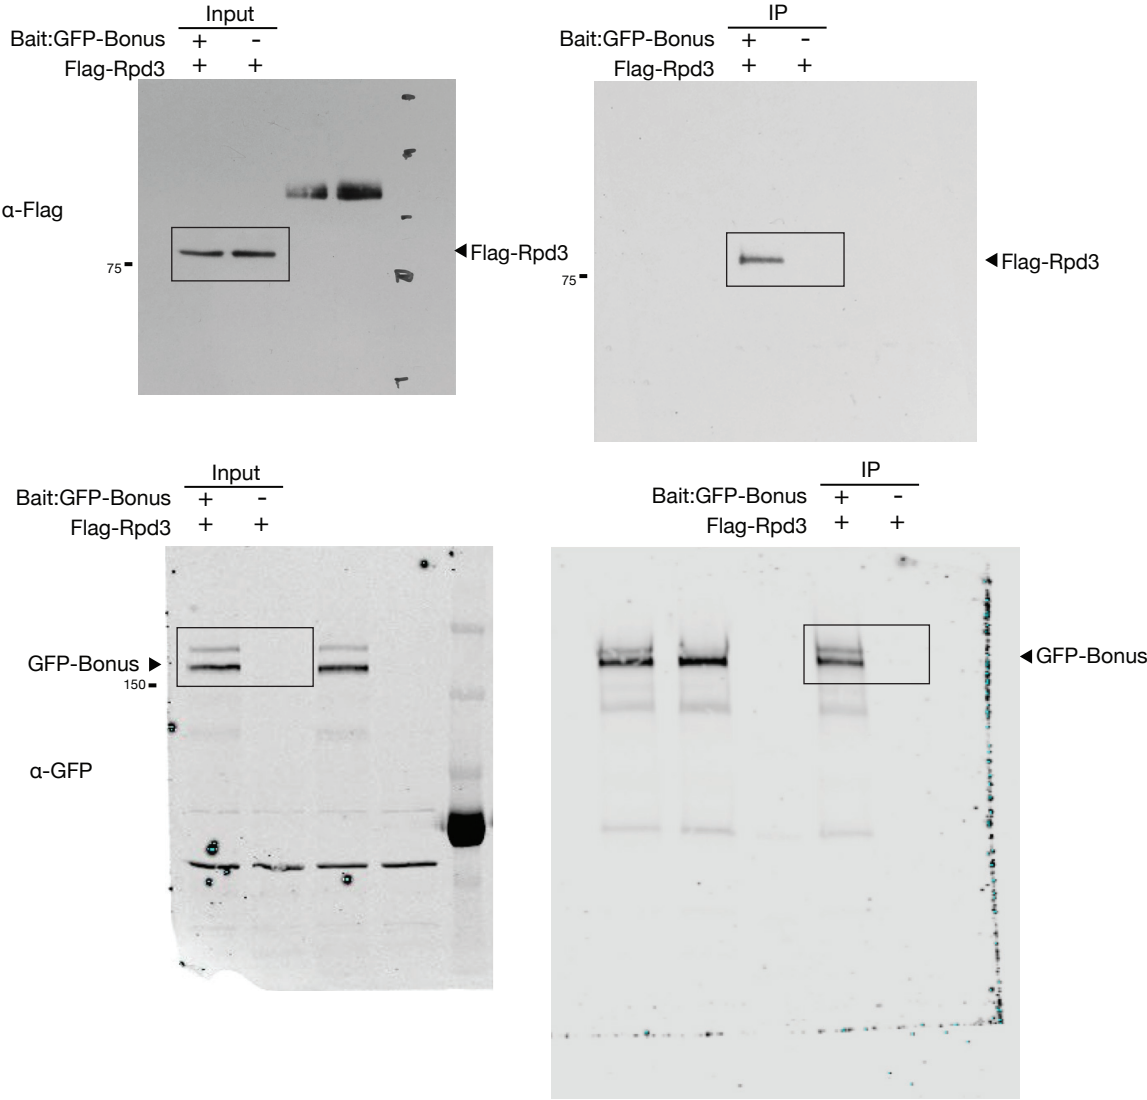

Supplement: fig4-data2 [file elife-89493-fig4-data2-v1.zip]

Figure 4D

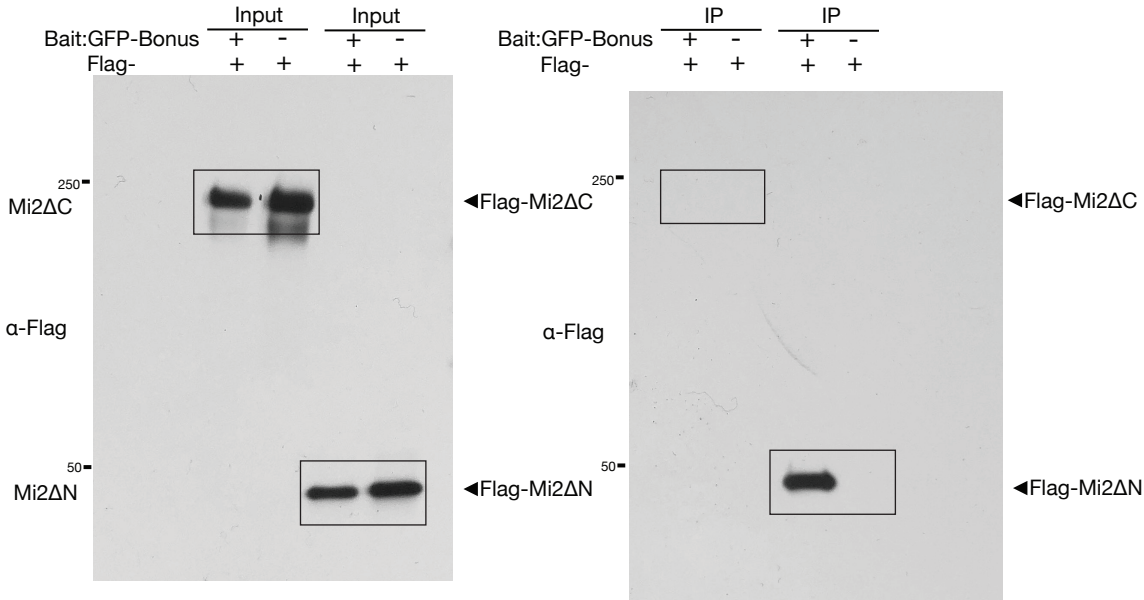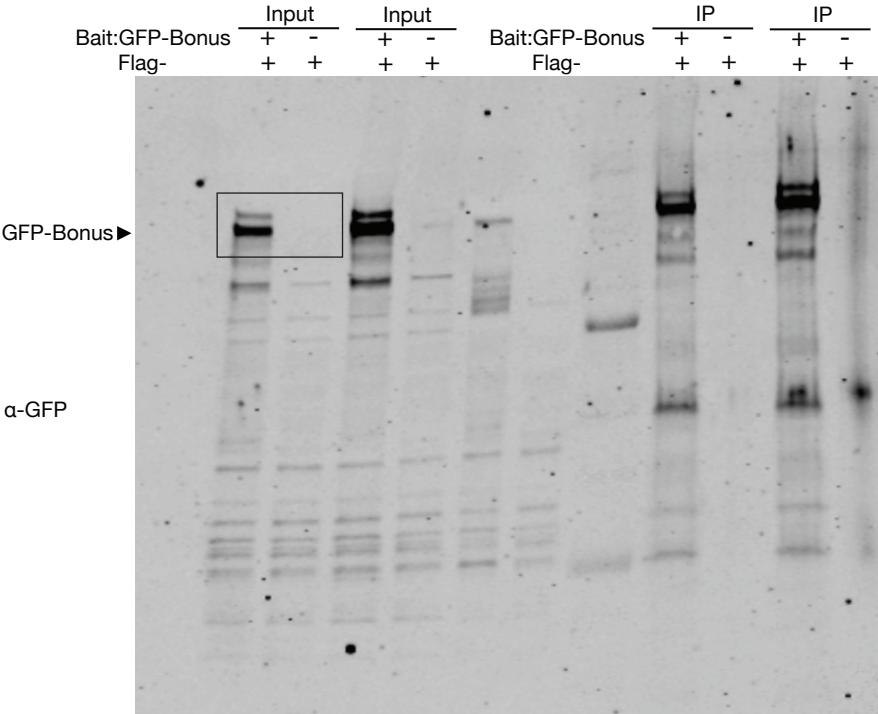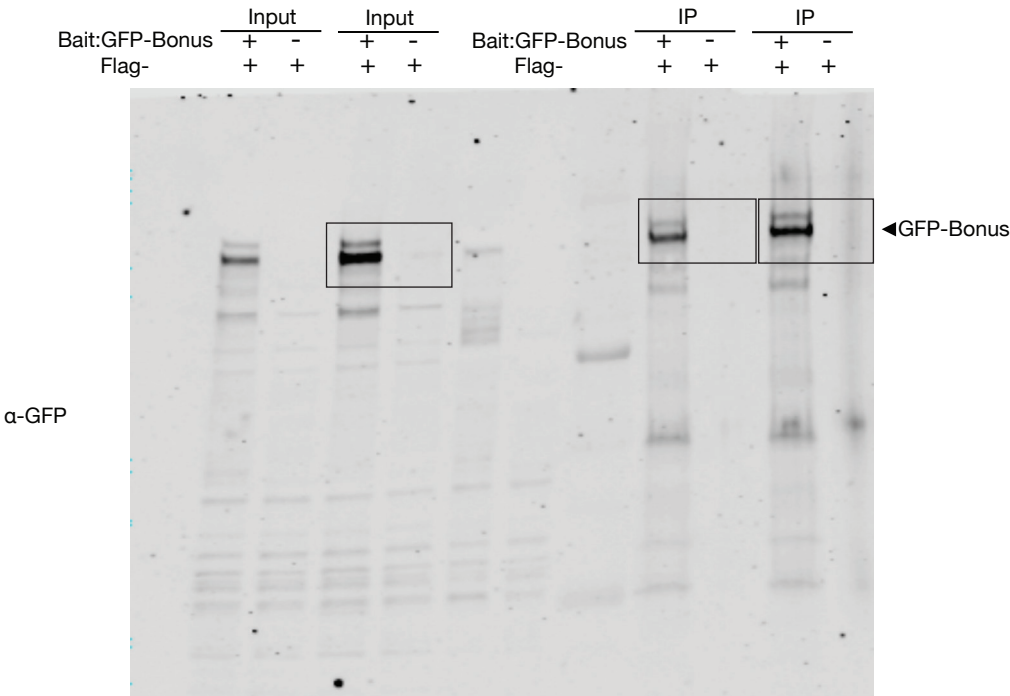

Supplement: fig4-data3 [file elife-89493-fig4-data3-v1.zip]

**Figure 4 - figure supplement 1A**

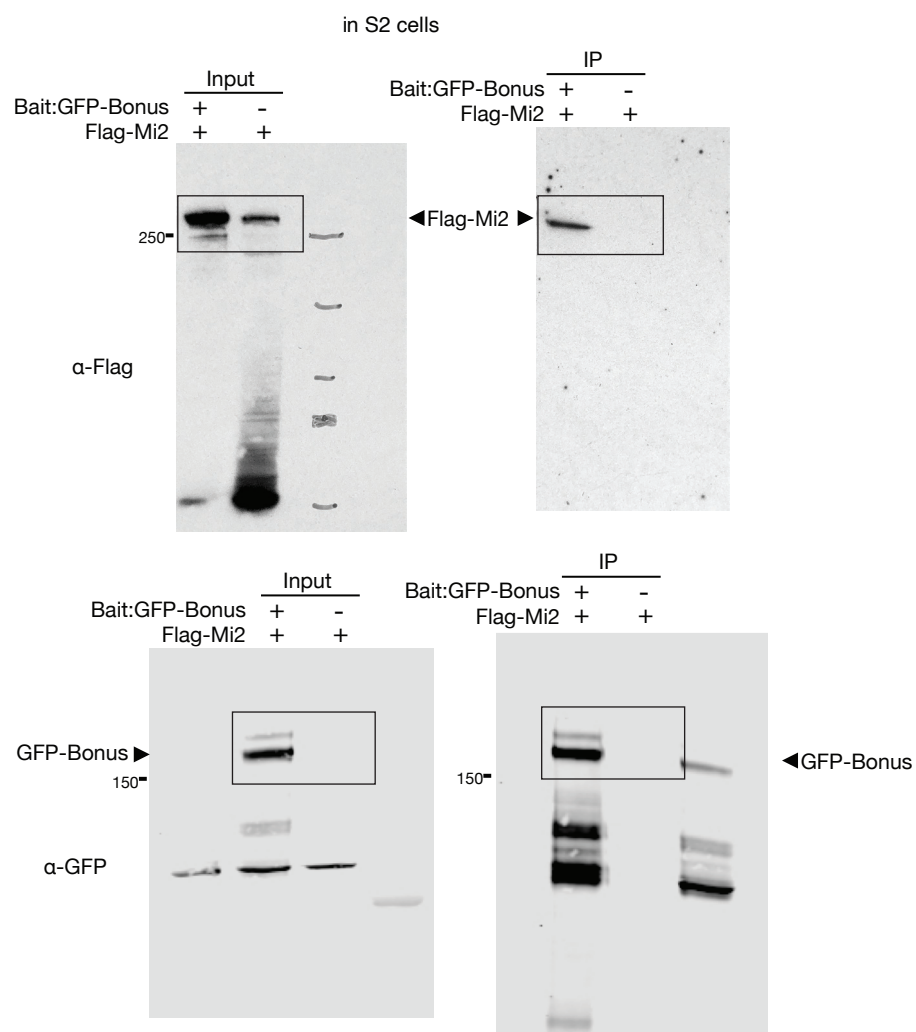

Supplement: fig4-figsupp1-data1 [file elife-89493-fig4-figsupp1-data1-v1.zip]

Figure 4 - figure supplement 1B

in S2 cells

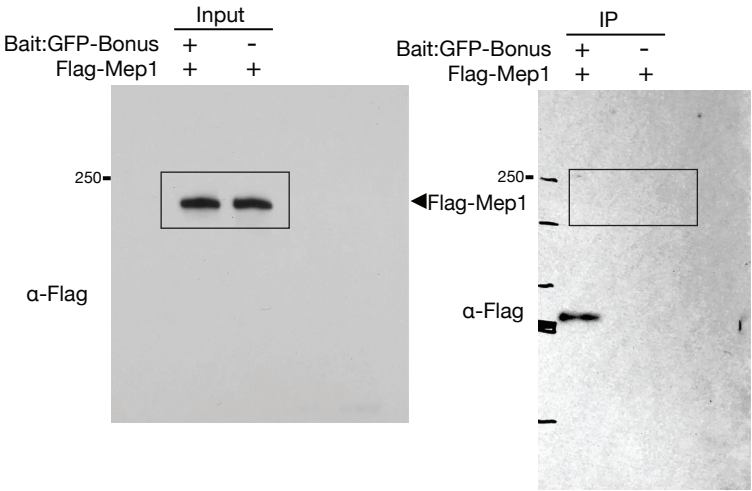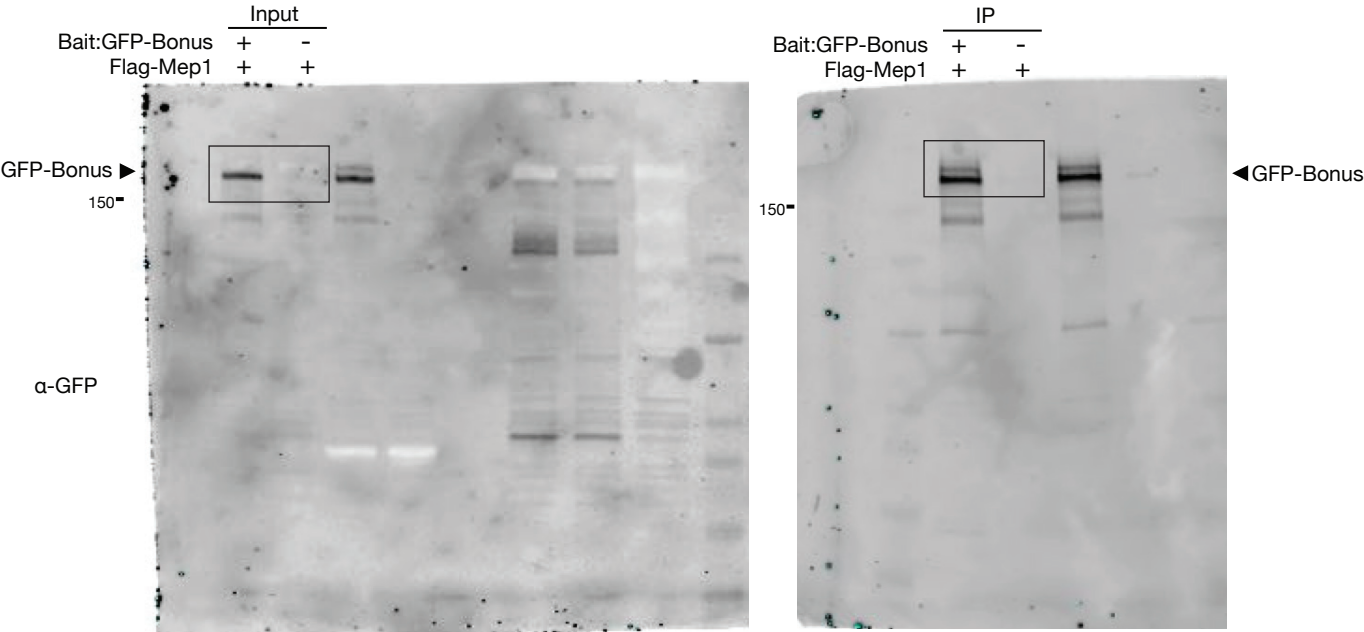

Supplement: fig4-figsupp1-data2 [file elife-89493-fig4-figsupp1-data2-v1.zip]

Figure 5B.

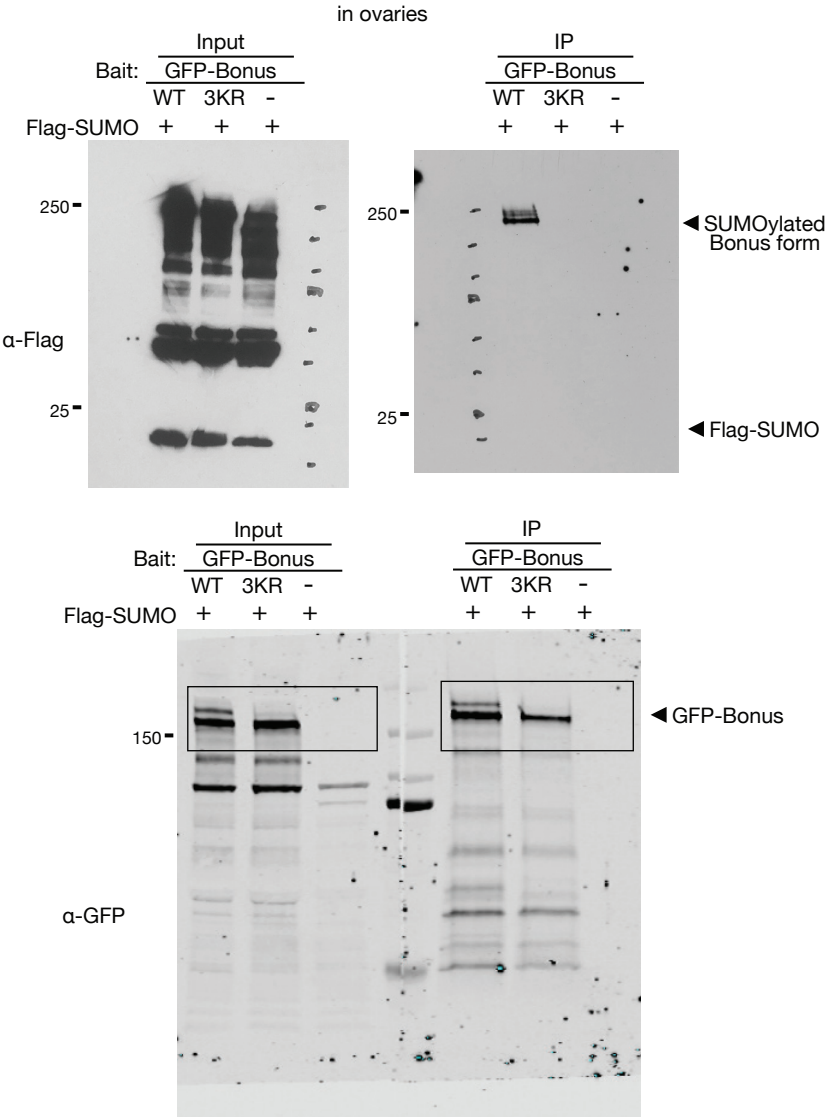

Supplement: fig5-data1 [file elife-89493-fig5-data1-v1.zip]

Figure 5C.

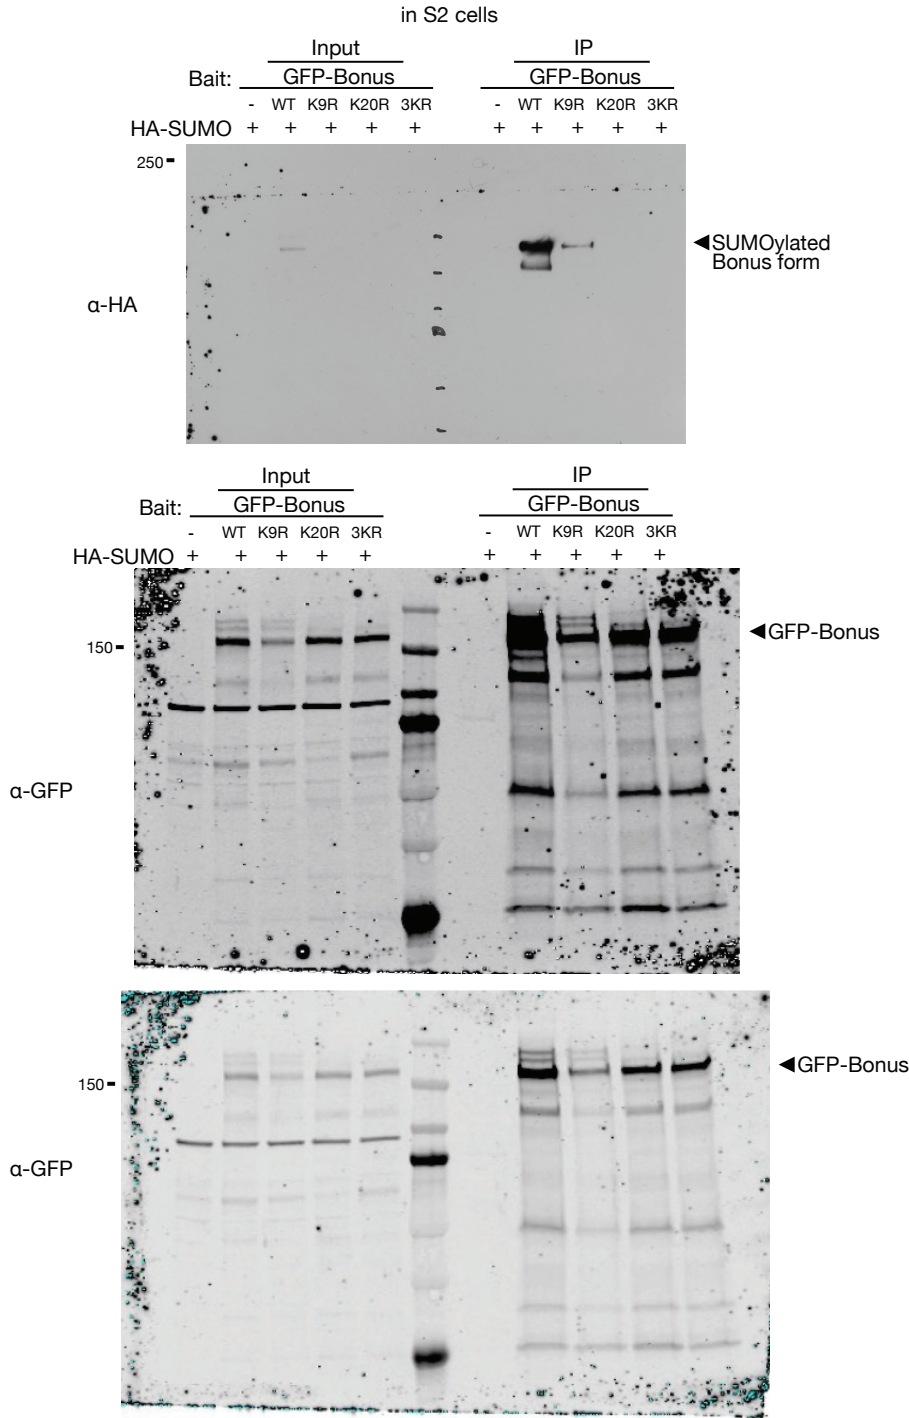

Supplement: fig5-data2 [file elife-89493-fig5-data2-v1.zip]

Figure 5F.

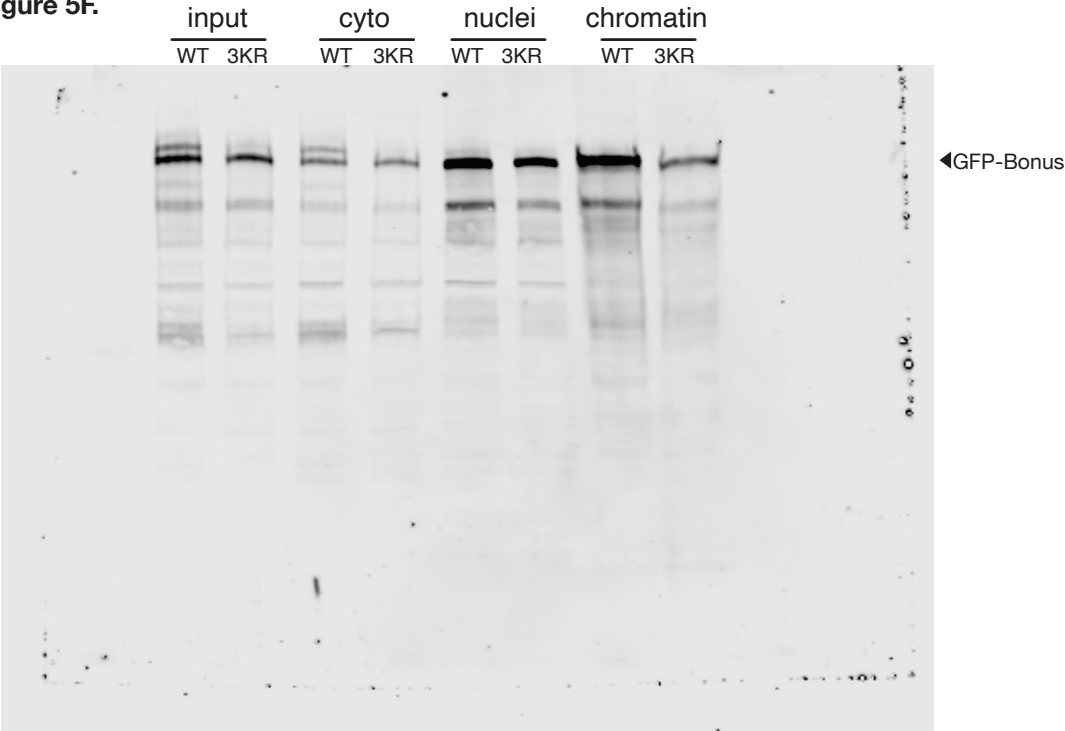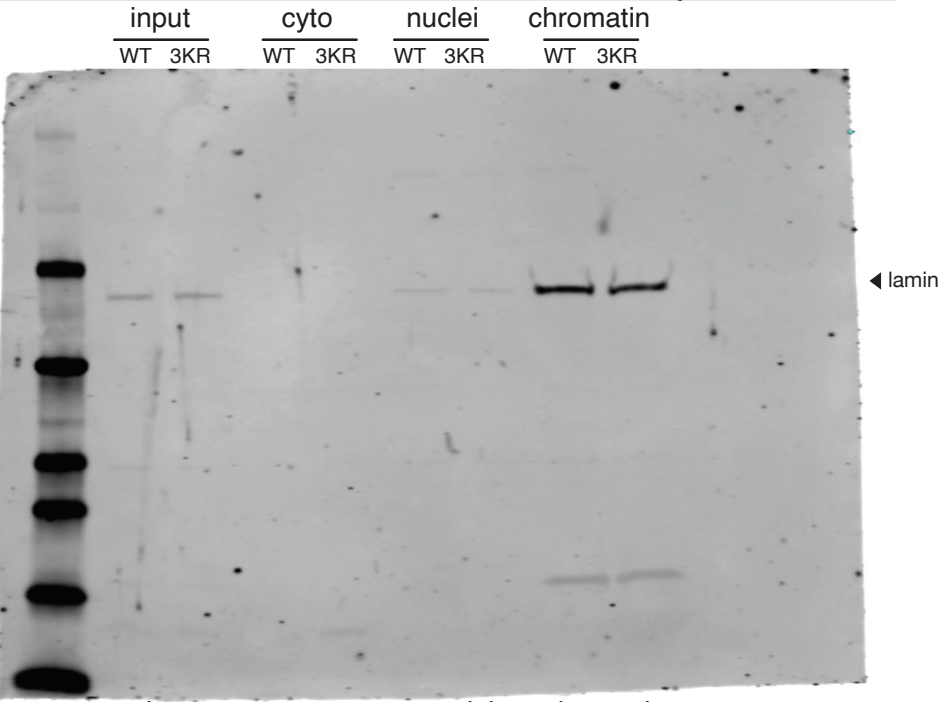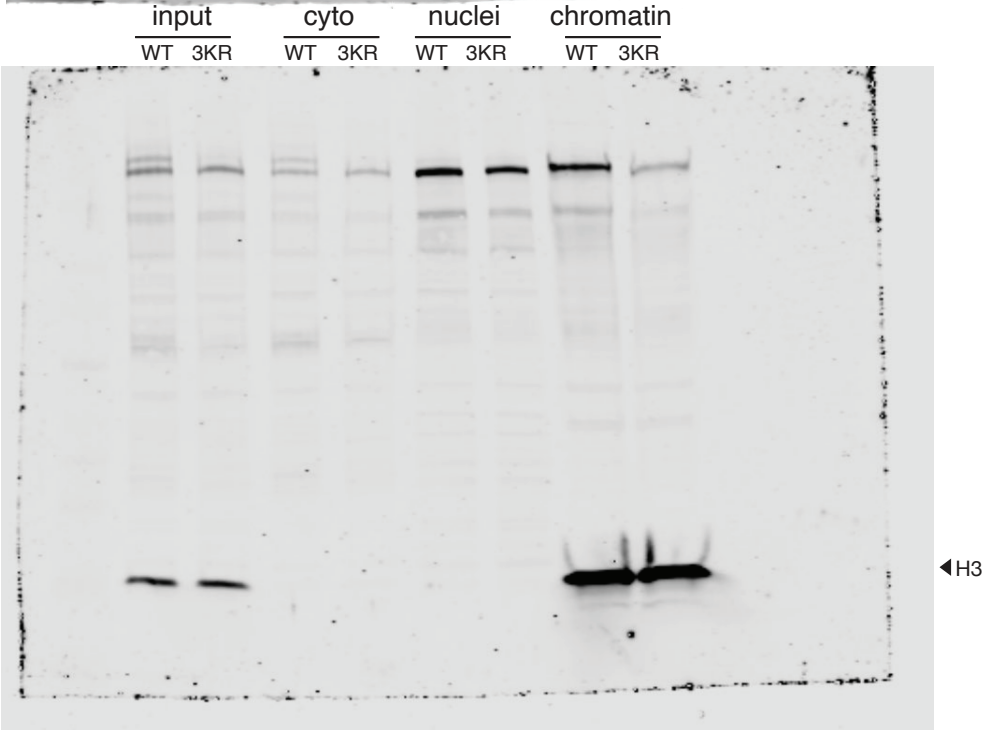

Supplement: fig5-data3 [file elife-89493-fig5-data3-v1.zip]

**Figure 5I.**

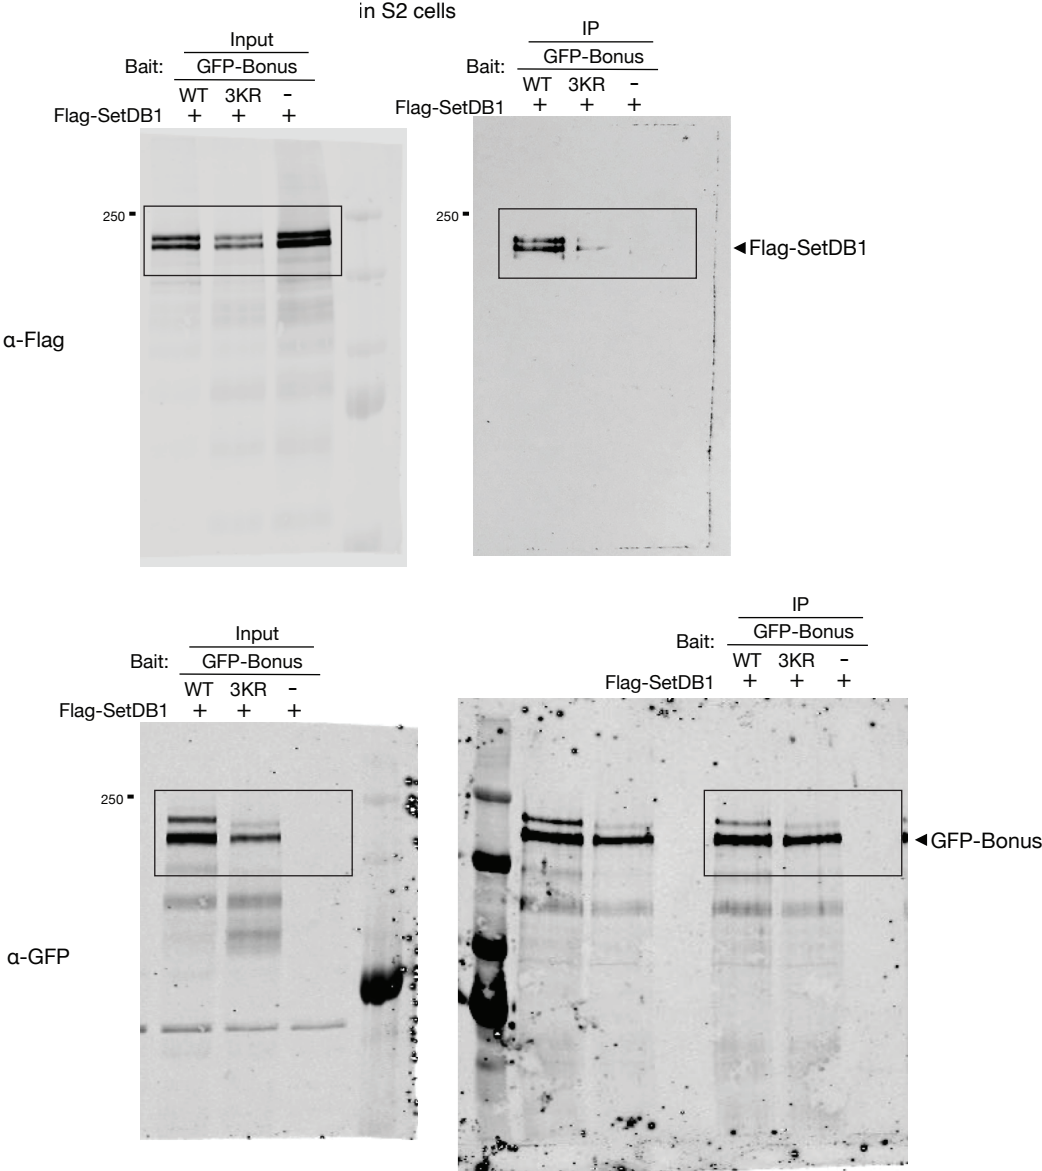

Supplement: fig5-data4 [file elife-89493-fig5-data4-v1.zip]

Figure 5 - figure supplement 1A

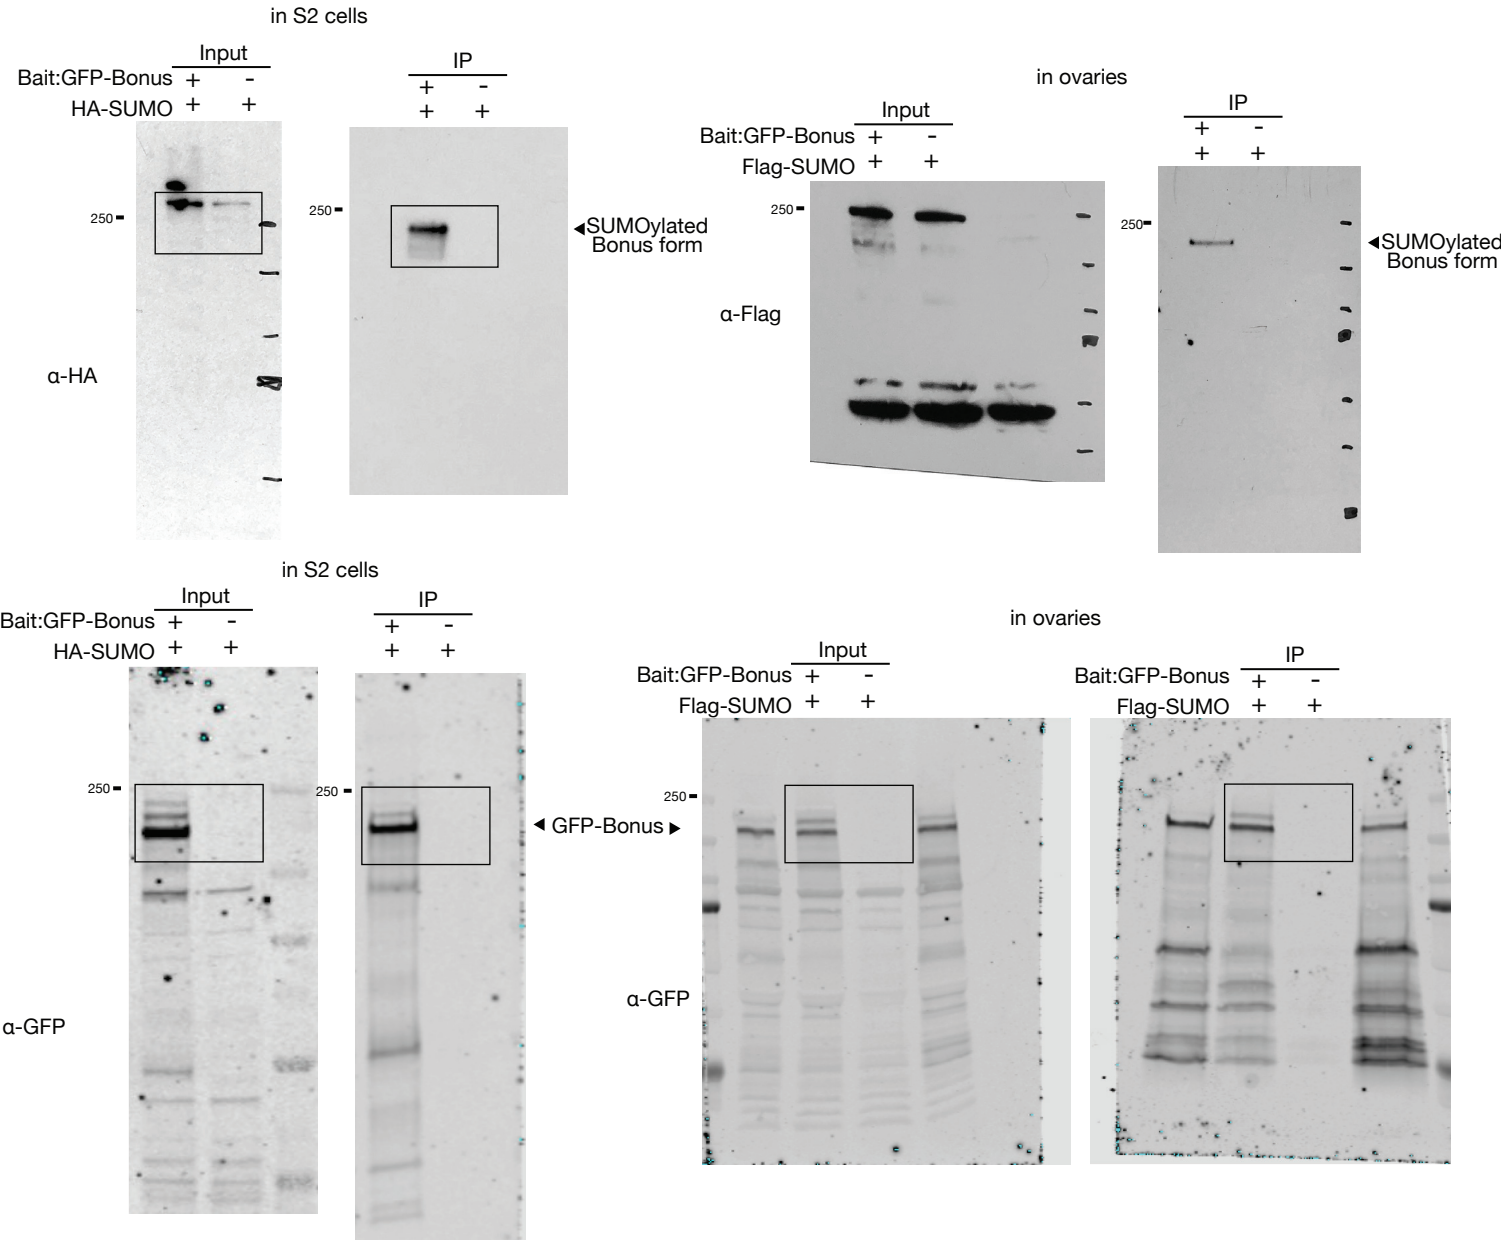

Supplement: fig5-figsupp1-data1 [file elife-89493-fig5-figsupp1-data1-v1.zip]

Figure 5 - figure supplement 1B

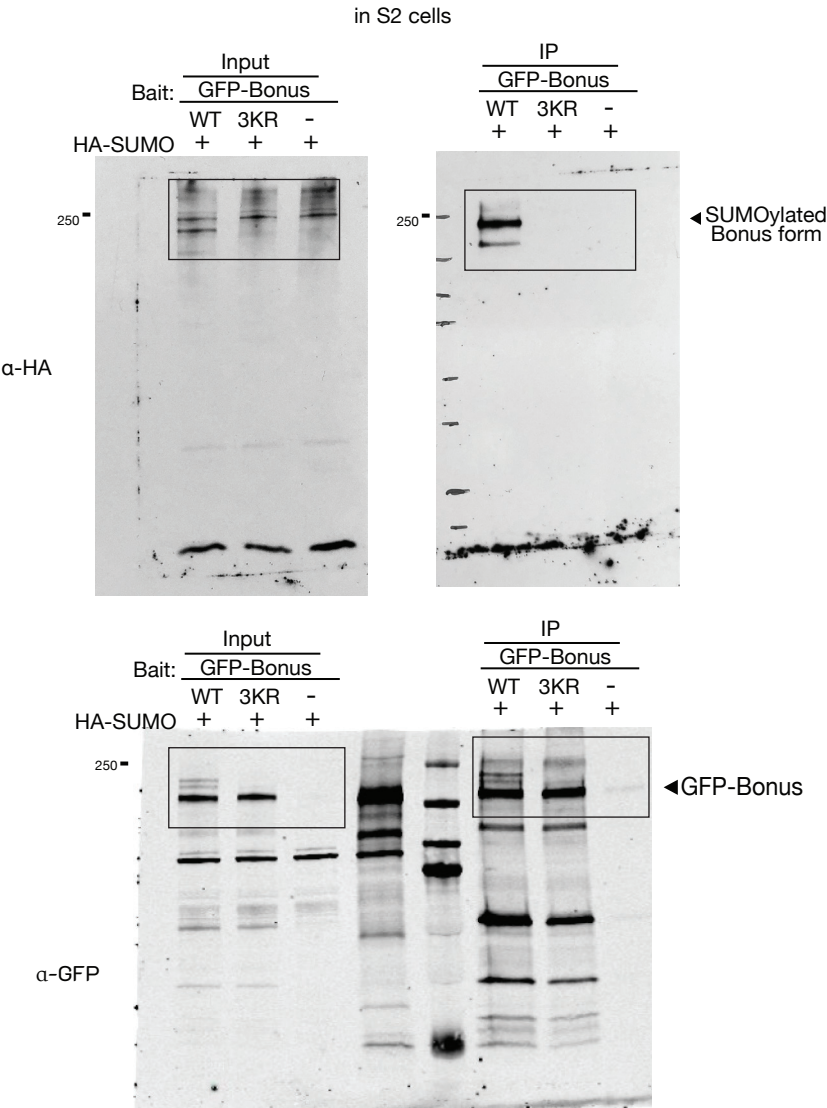

Supplement: fig5-figsupp1-data2 [file elife-89493-fig5-figsupp1-data2-v1.zip]

Figure 5 - figure supplement 1C

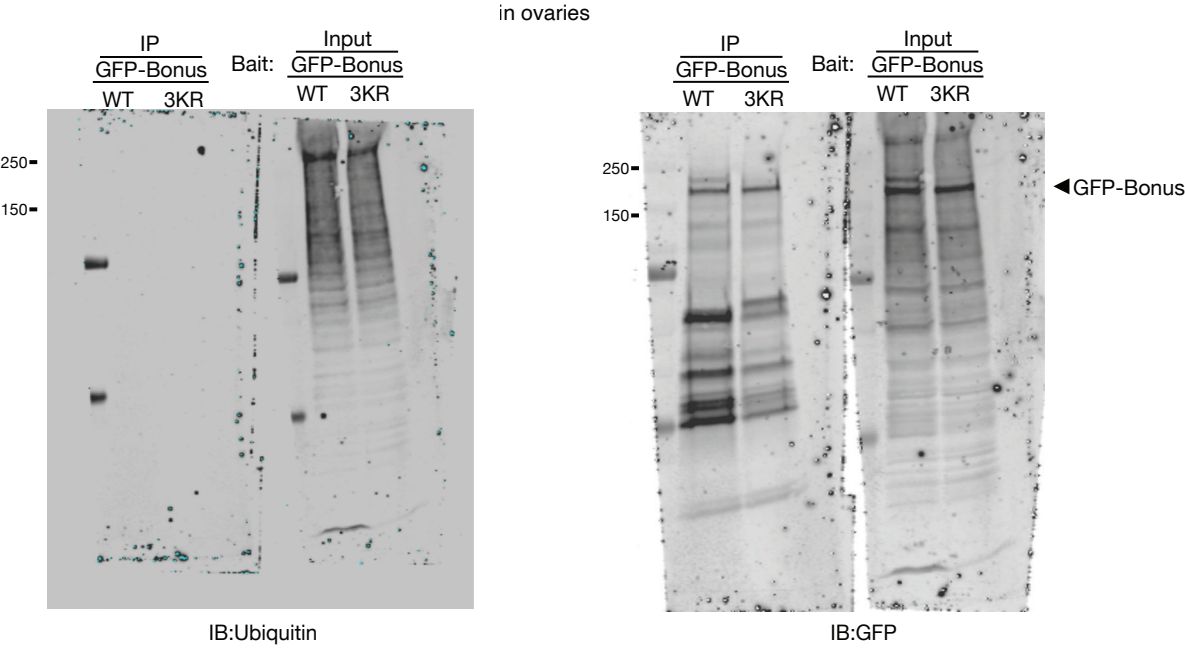

Supplement: fig5-figsupp1-data3 [file elife-89493-fig5-figsupp1-data3-v1.zip]

Figure 5 - figure supplement 1D

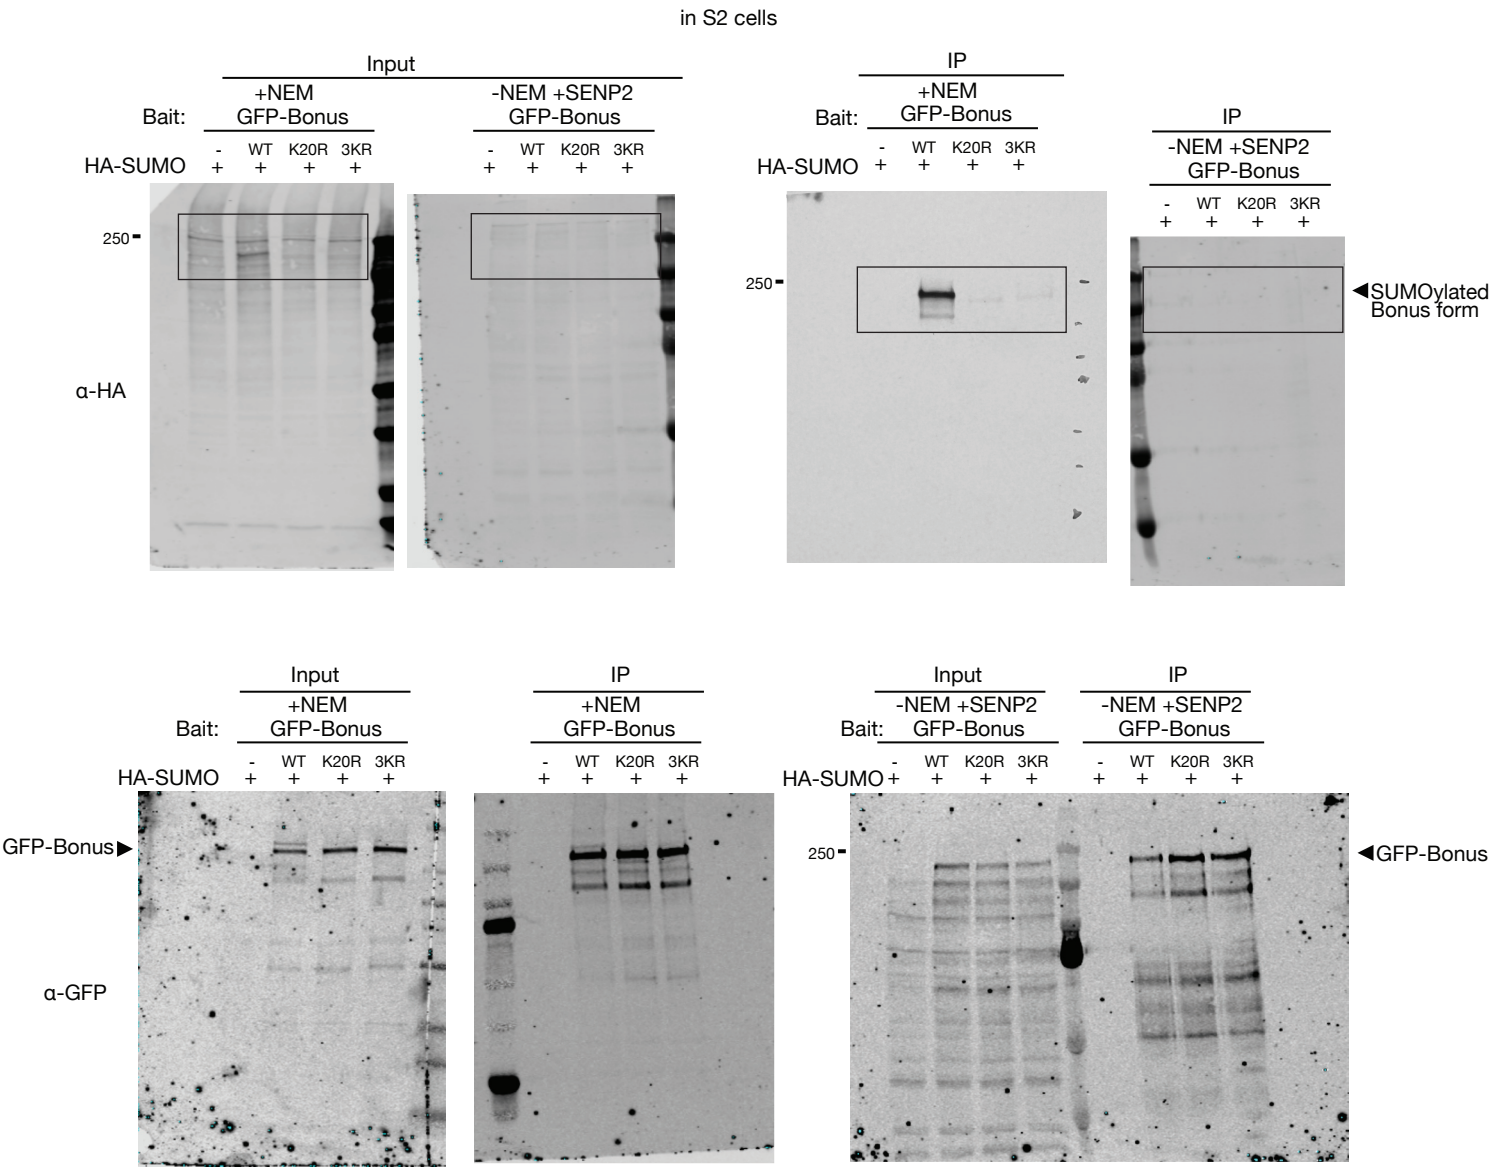

Supplement: fig5-figsupp1-data4 [file elife-89493-fig5-figsupp1-data4-v1.zip]

Figure 5 - figure supplement 2A

in S2 cells

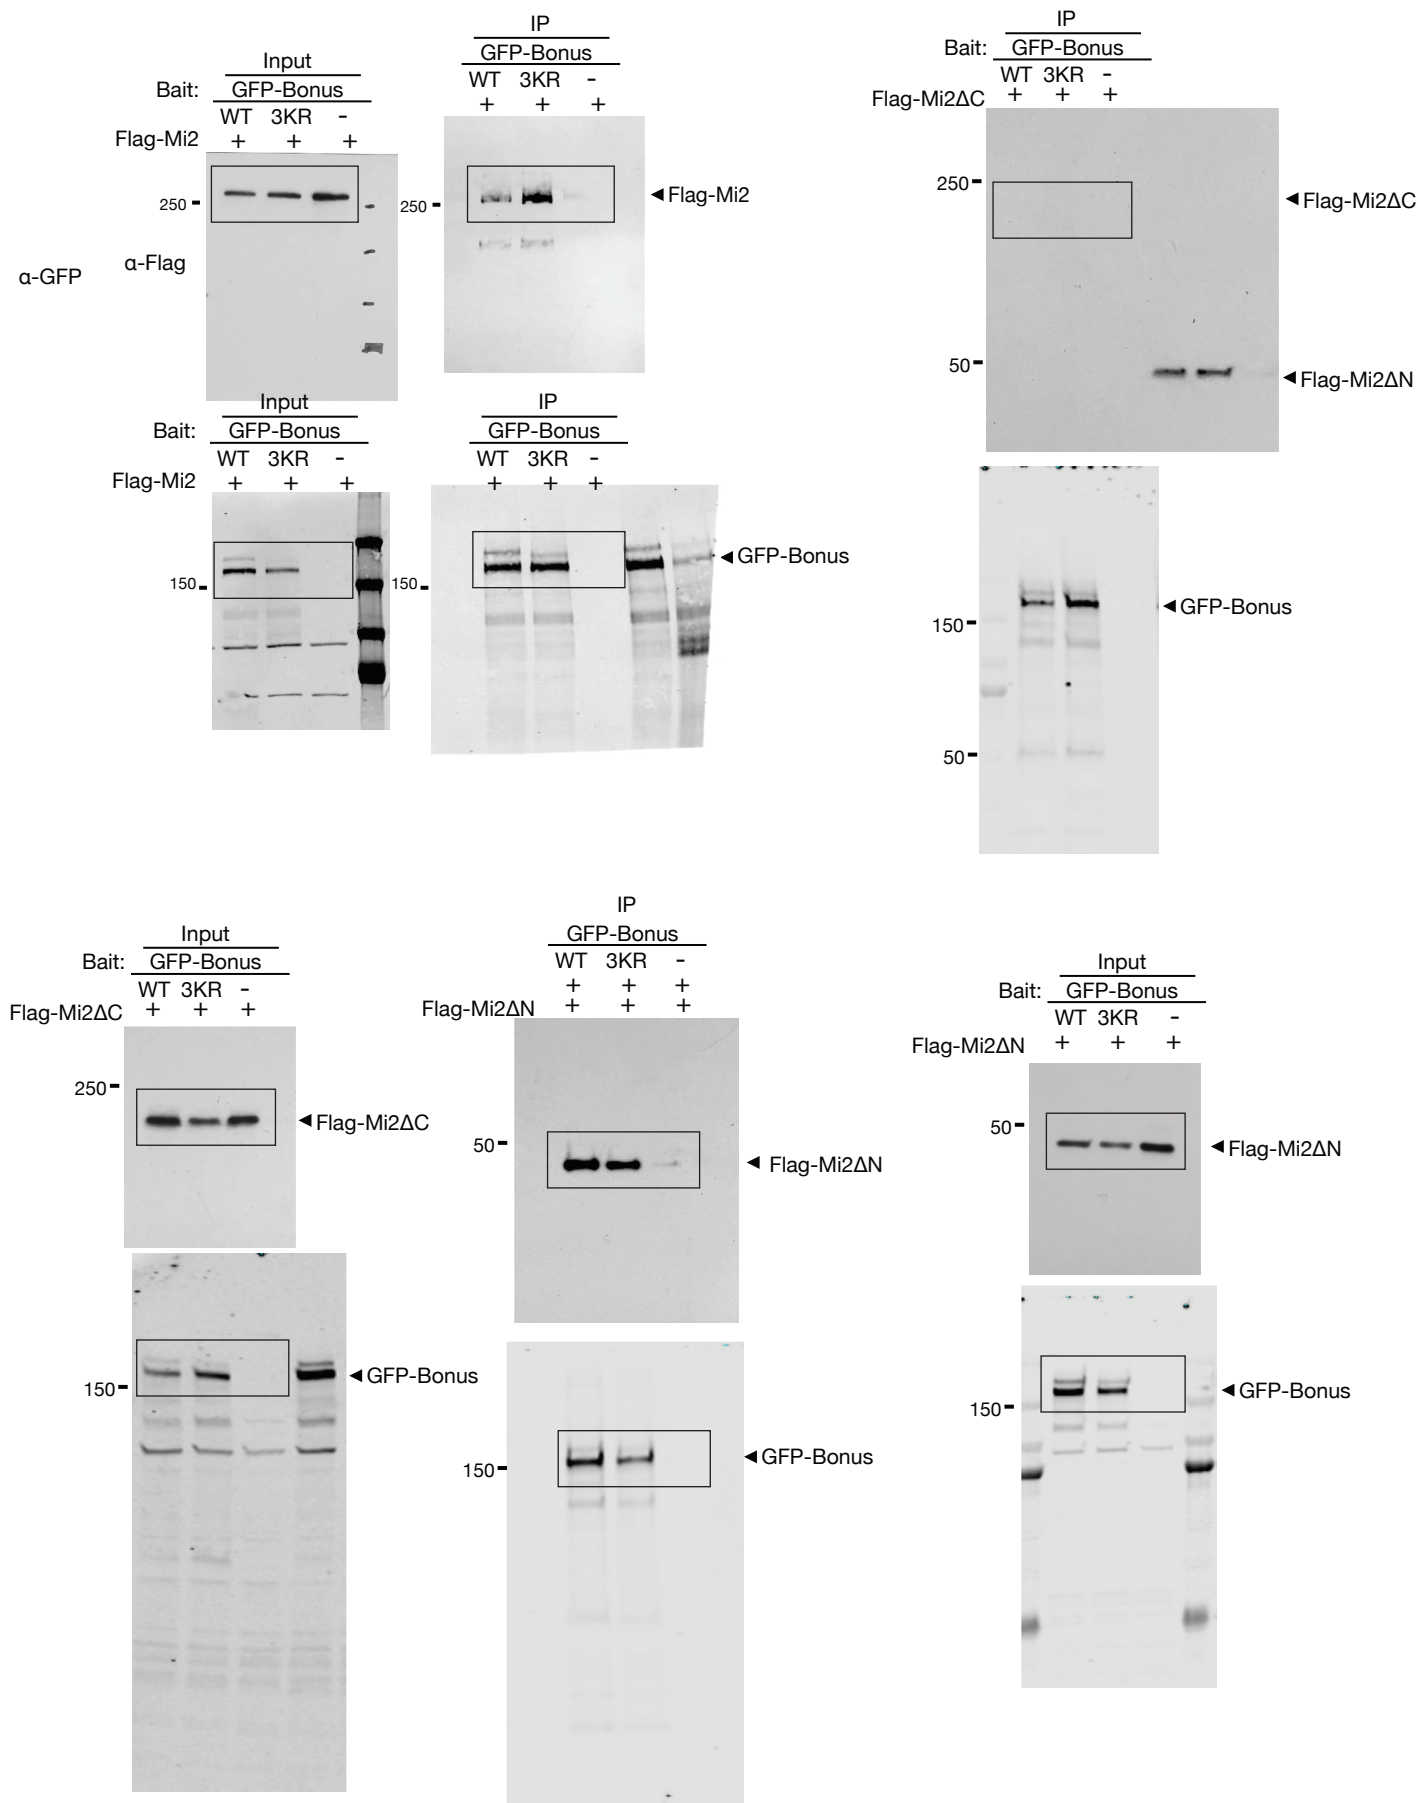

Supplement: fig5-figsupp2-data1 [file elife-89493-fig5-figsupp2-data1-v1.zip]

Figure 5 - figure supplement 2B

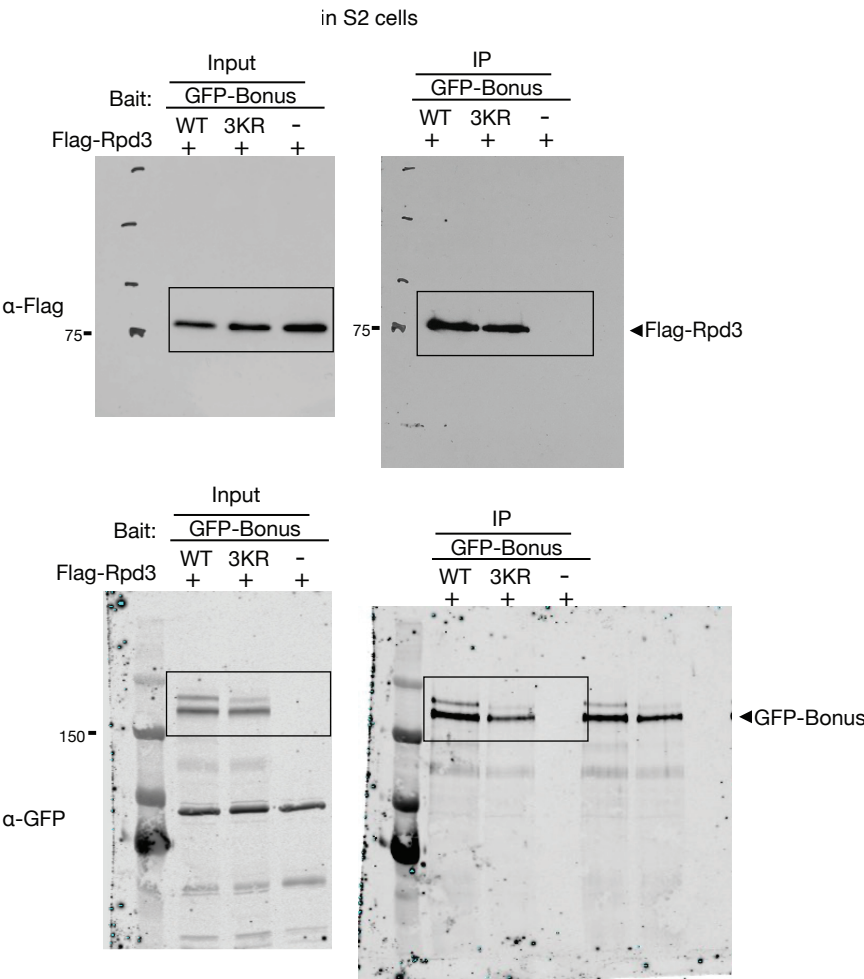

Supplement: fig5-figsupp2-data2 [file elife-89493-fig5-figsupp2-data2-v1.zip]

Figure 5 - figure supplement 2C

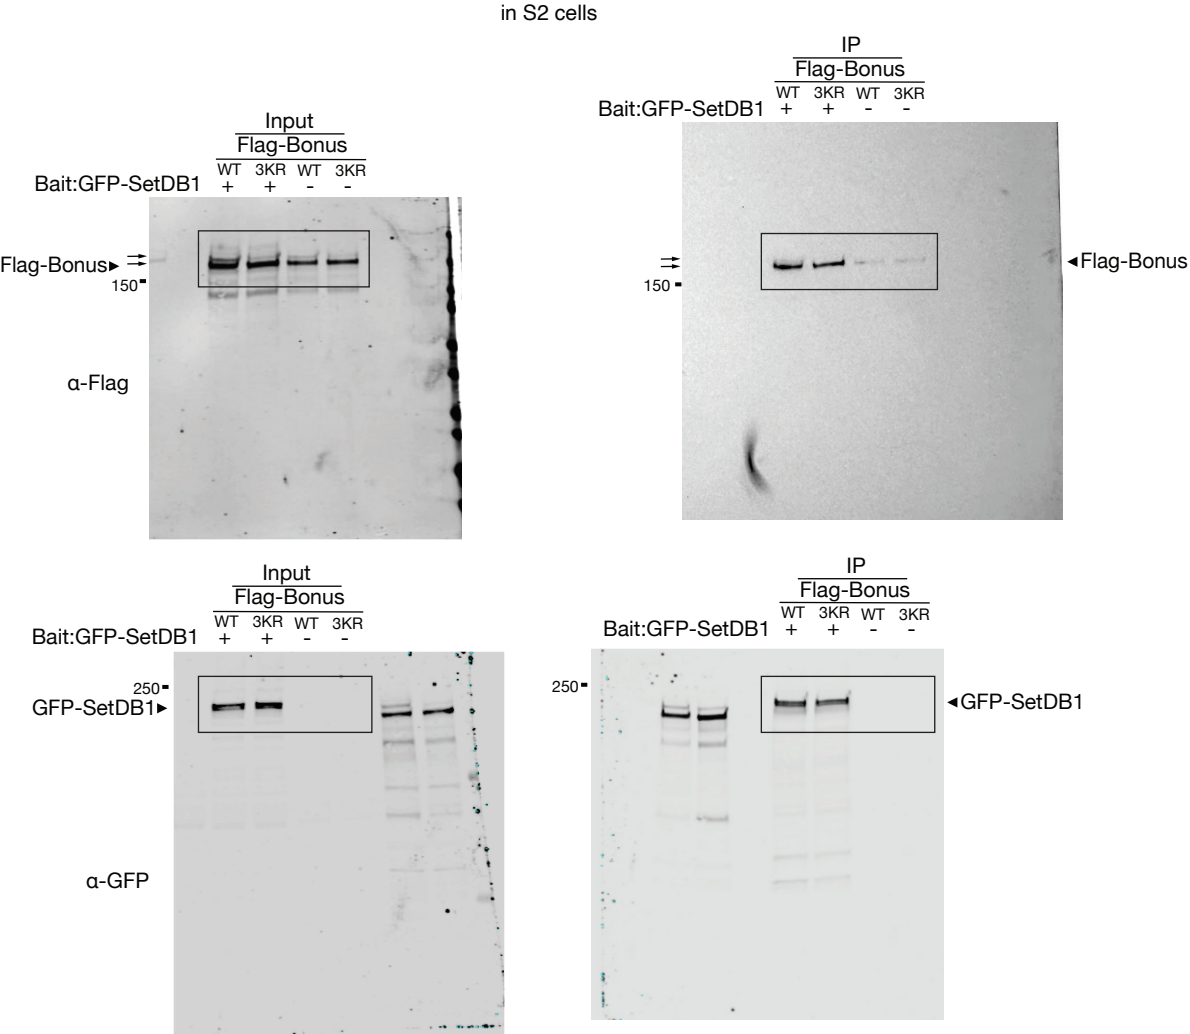

Supplement: fig5-figsupp2-data3 [file elife-89493-fig5-figsupp2-data3-v1.zip]

Figure 6A.

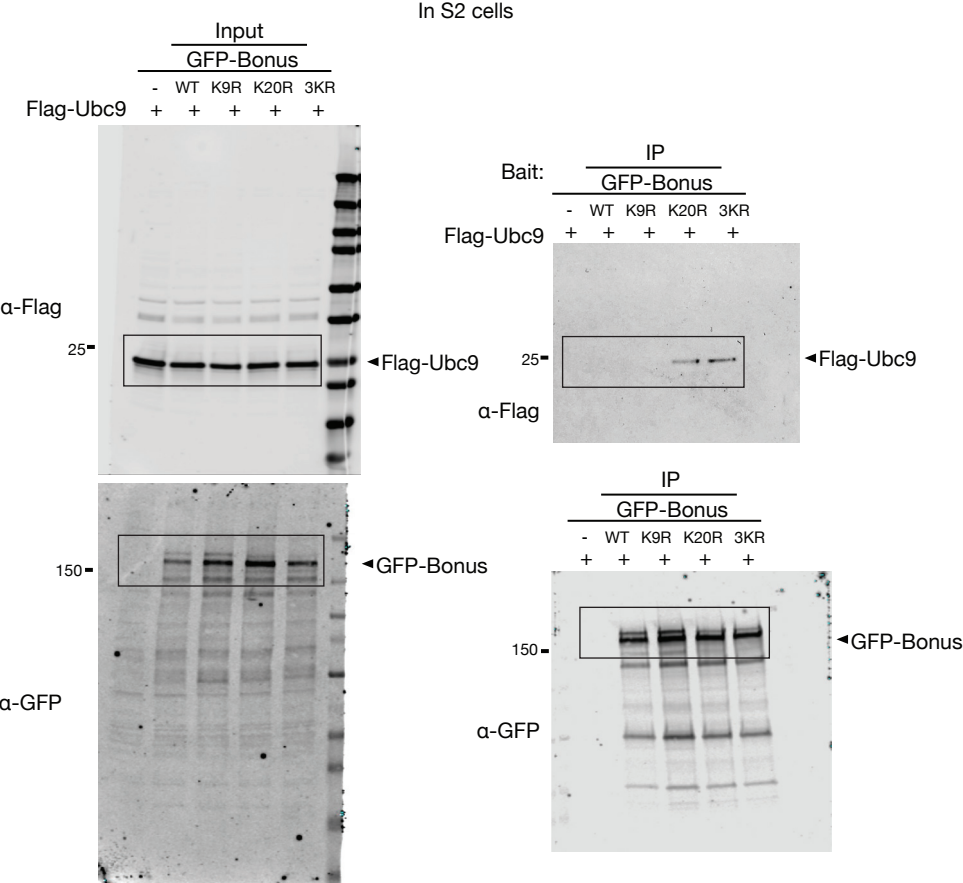

Supplement: fig6-data1 [file elife-89493-fig6-data1-v1.zip]

Figure 6B.

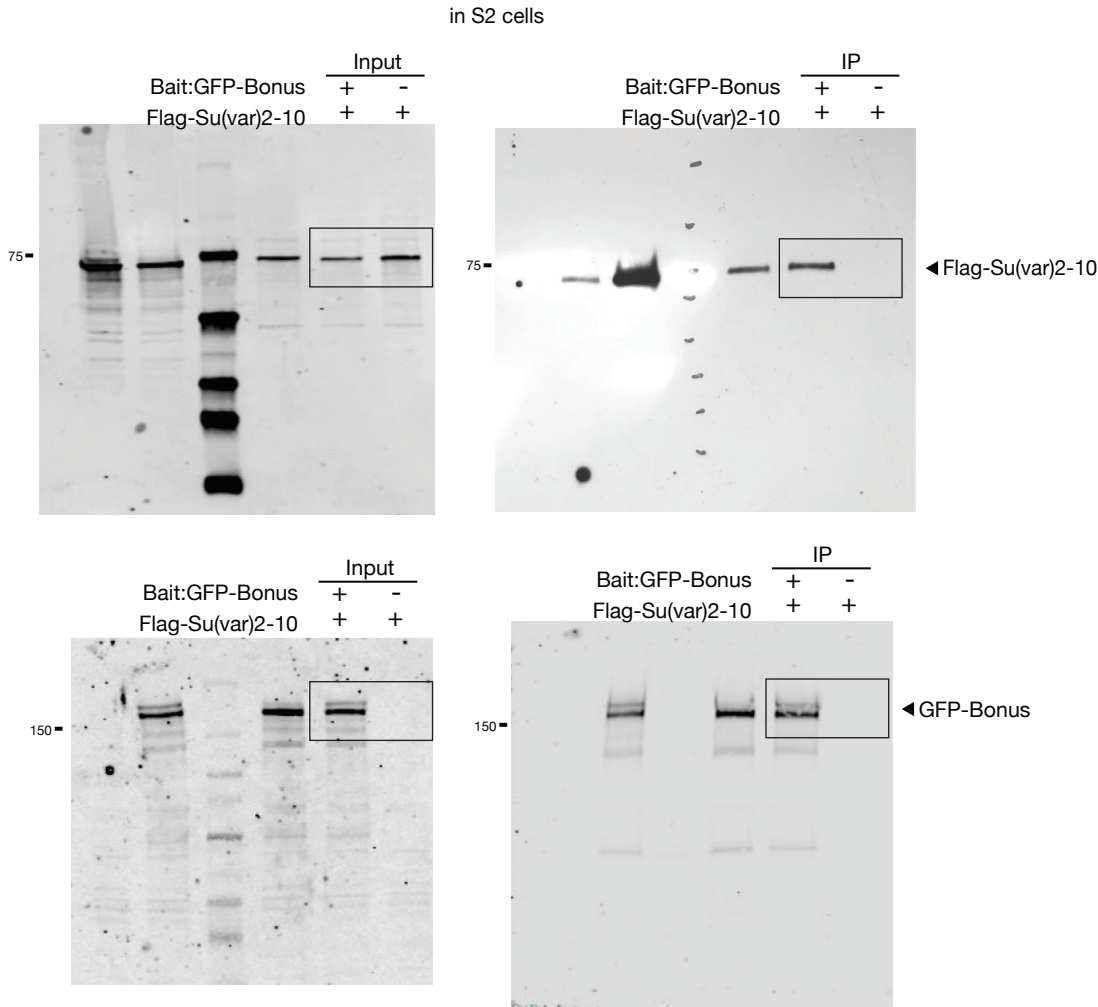

Supplement: fig6-data2 [file elife-89493-fig6-data2-v1.zip]

Figure 6C.

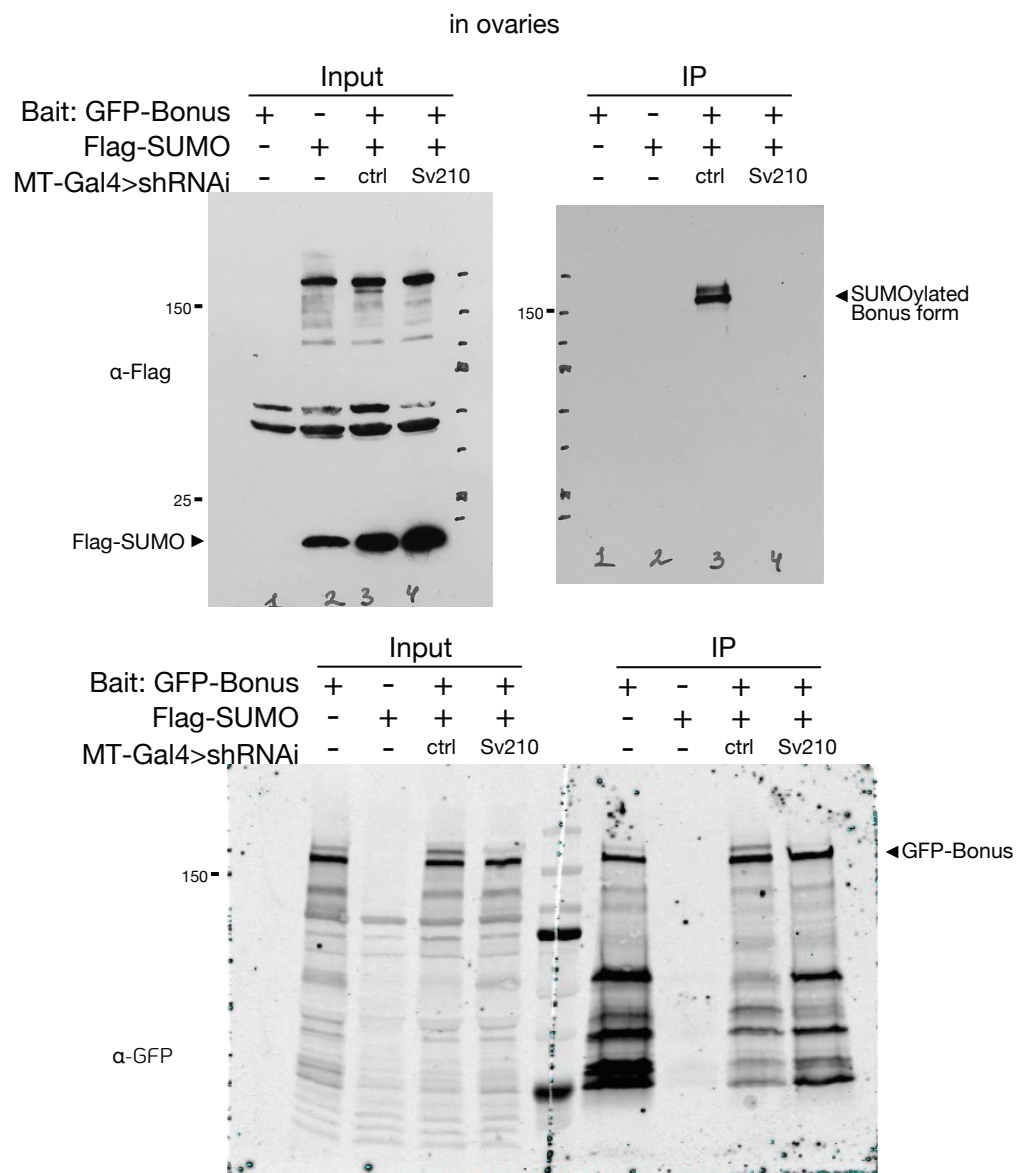

Supplement: fig6-data3 [file elife-89493-fig6-data3-v1.zip]

Figure 6 - figure supplement 1A

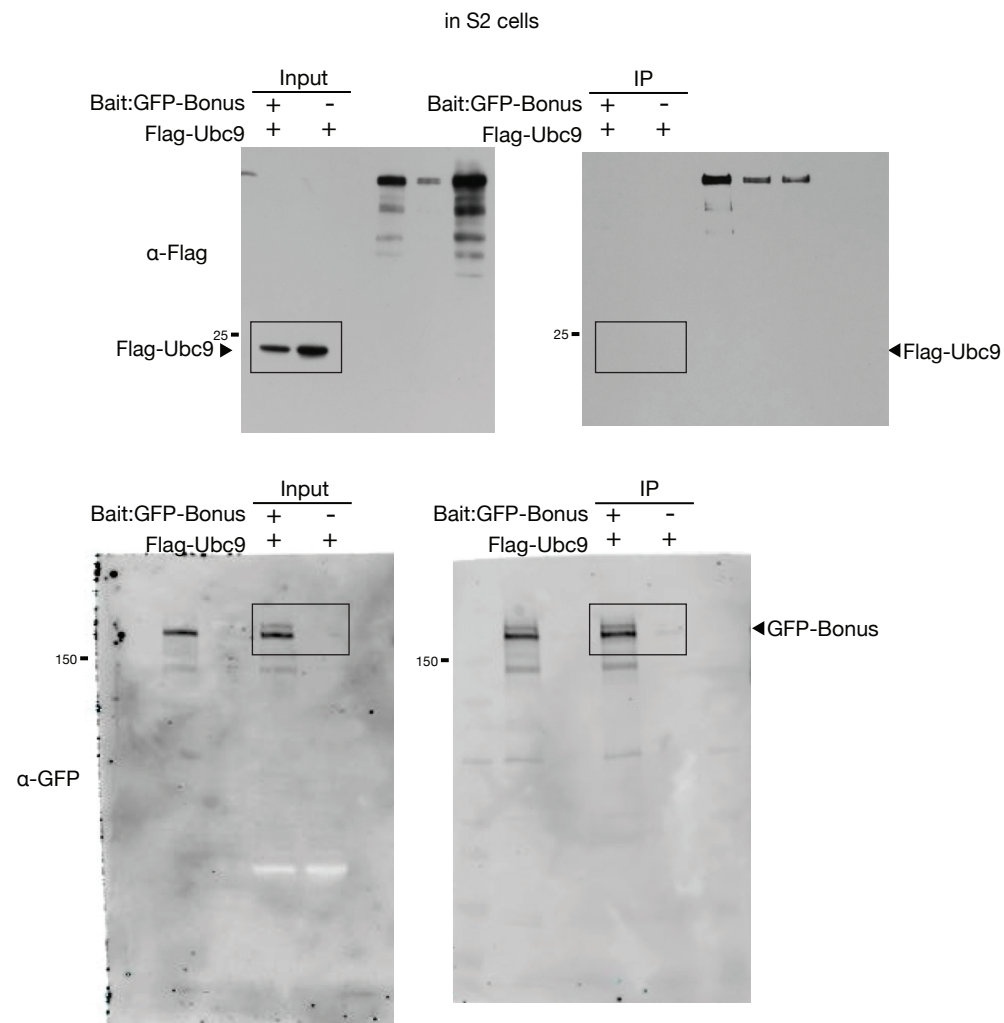

Supplement: fig6-figsupp1-data1 [file elife-89493-fig6-figsupp1-data1-v1.zip]

Figure 6 - figure supplement 1B

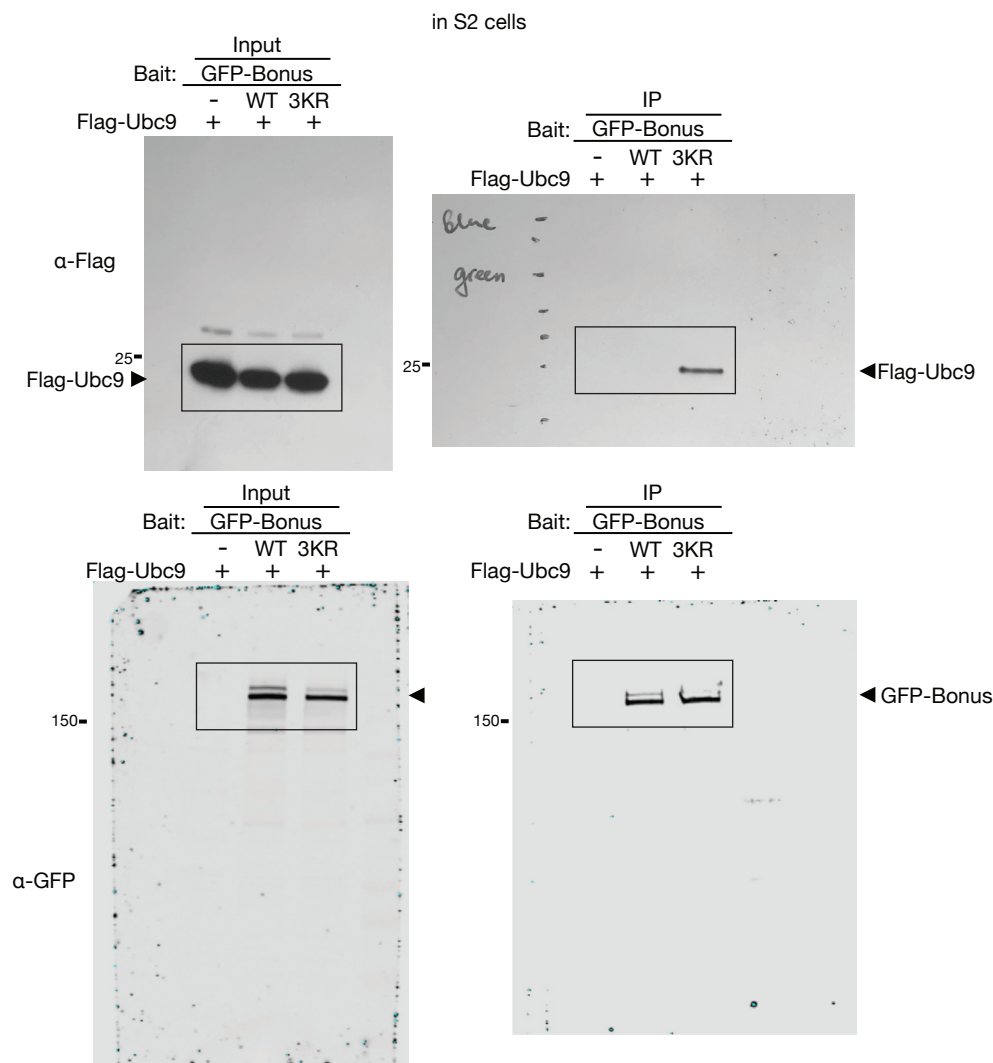

Supplement: fig6-figsupp1-data2 [file elife-89493-fig6-figsupp1-data2-v1.zip]
